# Supplementary material
Source: PubMed Central journal article supplement (PMC4496601)
Supplement: IAI.00230-15_zii999091328so1.pdf [file IAI.00230-15_zii999091328so1.pdf]

# 1 SUPPORTING INFORMATION

2

## 3 **Materials and Methods**

4 **Mutant construction** The *R. equi* MDM strain lacking all *vap* genes bar *vapA* was  
5 constructed by deletion of the *vapI-vapF* gene locus (containing *vapI*, *-C*, *-D*, *-E*, *-F*) in *R.*  
6 *equi*  $\Delta vapG\Delta icgA-vapH-orf7$ . A 715 bp region of DNA upstream of *vapI* was amplified  
7 using primers *vapI-up-F* and *vapI-up-R* and the amplicon was digested with *Bam*HI and *Eag*I  
8 and ligated into pSelAct (1) that had been previously digested with the same enzymes,  
9 yielding pGBC17. Subsequently, a 709 bp fragment of DNA downstream of *vapF* was  
10 amplified using primer pair *vapF-up-F* and *vapF-up-R*, and digested with *Bam*HI and *Eco*RI.  
11 This fragment was then ligated into pGBC17 which had been digested with *Bam*HI and  
12 *Eco*RI creating pGBC18, which was electroporated into *R. equi*  $\Delta vapG\Delta icgA-vapH-orf7$ .  
13 Apramycin resistant transformants were grown for 20 h in LB medium at 37 °C. Aliquots  
14 (100  $\mu$ l) of these cultures were plated in  $10^{-4}$  to  $10^{-6}$  dilutions onto acetate containing minimal  
15 medium agar plates supplemented with 100  $\mu$ g/ml 5-fluorocytosine and incubated for 3 days  
16 at 37 °C.

17 **Expression of *virR*, *virS* and *vapA*.** Plasmid pVirR (for expression of *virR*) was  
18 generated by amplification of *virR* with its promoter region (1872 bp) from *R. equi* 103S  
19 using primers PAI38d12\_2080F and PAI4\_1872R (**Table S2**), which carried *Bcl*II and *Pci*I  
20 restriction sites, and cloning of this fragment into pSET152 previously digested with *Bam*HI  
21 and *Pci*I. Plasmid pVirRS (for expression of *virR* and *virS*) was generated using total  
22 genomic DNA from *R. equi*  $\Delta vapG\Delta icgA-vapH-orf7$ , which carries an in-frame deletion of  
23 *icgA-orf7*, as template for a PCR reaction, amplifying a DNA fragment of 2890 bp starting at  
24 the terminal part of *orf3* and continuing until the stop codon of *virS*. Primers used  
25 (PAI38d12\_2890F and Orf8 InterSeq\_918R) introduced *Bcl*II and *Pci*I restriction sites, which  
26 facilitated cloning of the resulting PCR product into the respective *Bam*HI/*Pci*I sites of  
27 pSET152 giving rise to plasmid pVirRS. Plasmid pVirS (for expression of *virS*) was

28 generated by using the Quick Change Kit (Invitrogen) according the manufacturer's  
29 recommendations and primers 4aa8\_9468F and 4aa8\_9468R to introduce two adenine  
30 residues at position 484 of *virR* in pVirRS producing a frameshift mutation. The *vapA* gene  
31 with its native promoter was amplified (using primer pair *vapA*\_PciI F/*vapA*\_PciI R) and  
32 inserted into the *PciI* site of pVirRS yielding plasmid pVirRSvapA. *R. equi* strains 103S<sup>P</sup>-  
33 /pVirR and 103S<sup>P</sup>/pVirS were co-transformed with the episomal plasmid pMV261.vapA (2)  
34 in which *vapA* is constitutively expressed from the mycobacterial *hsp60* promoter, thus  
35 yielding 103S<sup>P</sup>/pVirR::hsp60vapA and 103S<sup>P</sup>/pVirS::hsp60vapA

36 **Microarray expression analysis.** Briefly, purified cDNA (400 ng) was random-  
37 primer labeled with Cy3 nonamers using the Nimblegen One-Color DNA Labeling Kit  
38 (Roche). The array was then hybridized for 16 hours at 42°C, washed, dried, and scanned at 2  
39 µm resolution using a NimbleGen MS 200 Microarray Scanner (Roche). The NimbleScan  
40 v2.6 software (Roche) was used to extract fluorescence intensity signals from the scanned  
41 images and perform Robust Multi-Array (RMA) analysis to generate gene expression values.  
42 Analysis of normalized expression values, calculation of fold changes and P values were  
43 performed with ArrayStar software (DNASTAR, Madison, WI).

44

45

## 46 **Supporting Information Legends**

47 **Figure S1. Verification of the genotype of *R. equi* MDM.** Verification of the *R. equi* MDM  
48 genotype. Total *R. equi* DNA was used as template in a PCR reaction using primers specific  
49 for either *vapA*, *-C*, *-D*, *-E*, *-F*, *-G*, *-H* or *-I* to determine the presence of these genes in *R. equi*  
50 MDM. Shown are the amplicons for each primer pair amplifying a specific *vap* gene. Lane  
51 M: DNA size standards; lane +: *R. equi* 103S; lane -: *R. equi* 103S<sup>P</sup>; Lane MDM: *R. equi*  
52 MDM.

53

54 **Figure S2: Complementation of *R. equi* MDM with *icgA* restores wild type intracellular**  
55 **growth.** Intracellular growth of *R. equi* strains was assessed in murine bone marrow derived  
56 macrophages infected with *R. equi* 103S, MDM and MDM/pAI35 at a MOI of 10. Following  
57 incubation for one hour to allow phagocytosis, monolayers were washed and treated with  
58 amikacin to kill remaining extracellular bacteria (t=0 h). Monolayers were lysed in triplicate  
59 24 h and 48 h post-infection (hpi). Error bars represent the standard deviation of the mean.  
60 Horizontal lines represent the statistical significance of fold changes in CFU per monolayer  
61 for *R. equi* strains represented by bars at the end of each line.

62 **Figure S3. Reverse transcription PCR confirming transcription of *virR*, *virS* and *vapA***  
63 **in *R. equi* 103S<sup>P</sup>/pVirRSvapA.** Total RNA was extracted from *R. equi* strains 103S<sup>P</sup>-  
64 /pVirRSvapA (lanes 1, 3, 5 and 7) and 103S (lanes 2, 4, 6 and 8). cDNA was synthesized  
65 using equivalent concentrations of total RNA as template. The presence of *virR* (lanes 1 and  
66 2), *icgA* (lanes 3 and 4), *virS* (lanes 5 and 6) and *vapA* (lanes 7 and 8) was assessed by PCR  
67 using primer pairs (Table S2) that specifically amplify internal regions of each of these genes.  
68 Standard DNA markers are indicated on the left of the panel (M).

69

70 **Figure S4. Western blot analysis confirming VapA expression in recombinant *R. equi***  
71 **strains.** Whole-cell extracts were prepared from *R. equi* 103S (lane 1), virulence plasmid-

72 cured 103S<sup>P-</sup> (lane 2), 103S<sup>P-</sup>/pVirR::hsp60vapA (lane 3), 103S<sup>P-</sup>/pVirS::hsp60vapA (lane 4)  
73 and 103S<sup>P-</sup>/pVirRSvapA (lane 5), cultured at 37°C as described in the Materials and  
74 Methods. The presence of VapA protein was detected with rabbit polyclonal antiserum to  
75 VapA.

76 **Figure S5. Validation of microarray data with reverse transcription qPCR.** (A) The  
77 transcript levels of 18 genes were determined in three biological replicates, each measured in  
78 duplicate by reverse transcription qPCR using specific primers listed in Table S2. Log<sub>10</sub> fold  
79 changes in gene expression of *R. equi* 103S (black bars) or *R. equi* 103S<sup>P-</sup>/pVirRSvapA  
80 (white bars) relative to *R. equi* 103S<sup>P-</sup>. Error bars represent the standard error of fold changes.  
81 Dotted lines above and below the zero line represent a 2-fold increase or decrease in  
82 transcription levels. (B) Comparison of Log<sub>2</sub> fold changes in gene expression as determined  
83 by RT-qPCR and microarray analysis. Correlation coefficients of 103S (black symbols) and  
84 103S<sup>P-</sup>/pVirRSvapA (white symbols) are r<sup>2</sup>=0.965 and r<sup>2</sup>=0.969, respectively. (C) List of  
85 genes used for validation purposes.

86

**Table S1: Bacterial strains and plasmids used in this study**

| Strain or plasmid                              | Genotype or characteristics                                                                                                                                                            | Source/Reference |
|------------------------------------------------|----------------------------------------------------------------------------------------------------------------------------------------------------------------------------------------|------------------|
| <i>Escherichia coli</i>                        |                                                                                                                                                                                        |                  |
| DH5 $\alpha$                                   | F- $\Phi$ 80 <i>lacZ</i> $\Delta$ M15 $\Delta$ ( <i>lacZYA-argF</i> ) U169 <i>recA1 endA1 hsdR17</i> ( $r_K^-$ , $m_K^+$ ) <i>phoA supE44 <math>\lambda</math>- thi-1 gyrA96 relA1</i> | Zymo Research    |
| <i>Rhodococcus equi</i>                        |                                                                                                                                                                                        |                  |
| 103S                                           | Virulent strain containing an 81kb virulence plasmid                                                                                                                                   | (3)              |
| 103S <sup>P-</sup>                             | Plasmid-cured variant of strain 103S                                                                                                                                                   | (4)              |
| $\Delta$ <i>vapG</i>                           | $\Delta$ <i>vapG</i> Hyg <sup>R</sup>                                                                                                                                                  | (5)              |
| $\Delta$ <i>vapG</i> $\Delta$ <i>vapH-orf7</i> | <i>icgA-</i> $\Delta$ <i>vapG</i> $\Delta$ ( <i>icgA-vapH-orf7</i> ) Hyg <sup>R</sup>                                                                                                  | (6)              |
| MDM                                            | $\Delta$ <i>vapG</i> $\Delta$ ( <i>icgA,vapH,orf7</i> ) $\Delta$ ( <i>vapICD</i> , pVAPA_0680, <i>orf16, orf17, orf18</i> , pVAPA_0740, <i>vapE, vapF</i> ) Hyg <sup>R</sup>           | This study       |
| MDM/pAI35                                      | $\Delta$ <i>vapG</i> $\Delta$ ( <i>icgA,vapH,orf7</i> ) $\Delta$ ( <i>vapICD</i> , pVAPA_0680, <i>orf16, orf17, orf18</i> , pVAPA_0740, <i>vapE, vapF</i> ) Hyg <sup>R</sup> ,pAI35    | This study       |
| 103S <sup>P-</sup> /pVirR                      | 103S <sup>P-</sup> , pVirR                                                                                                                                                             | This study       |
| 103S <sup>P-</sup> /pVirRSvapA                 | 103S <sup>P-</sup> , pVirRSvapA                                                                                                                                                        | This study       |
| 103S <sup>P-</sup> /pVirS                      | 103S <sup>P-</sup> , pVirS                                                                                                                                                             | This study       |
| 103S <sup>P-</sup> /pVirR<br>::hsp60vapA       | 103S <sup>P-</sup> , pVirR, <i>hsp60::vapA</i>                                                                                                                                         | This study       |
| 103S <sup>P-</sup><br>/pVirS::hsp60vapA        | 103S <sup>P-</sup> , pVirS <i>hsp60::vapA</i>                                                                                                                                          | This study       |
| <i>Plasmids</i>                                |                                                                                                                                                                                        |                  |
| pSelAct                                        | Apr <sup>R</sup> , <i>lacZ, codA:upp</i>                                                                                                                                               | (1)              |
| pSET152                                        | $\phi$ C31 integrase <i>attP</i> Apr <sup>R</sup>                                                                                                                                      | (2)              |
| pGBC10                                         | pSelAct containing 734 bp upstream of <i>icgA</i>                                                                                                                                      | This study       |
| pGBC11                                         | pGBC10 containing 726 bp downstream of <i>orf7</i>                                                                                                                                     | This study       |
| pGBC17                                         | pSelAct containing 751 bp upstream of <i>vapI</i>                                                                                                                                      | This study       |
| pGBC18                                         | pGBC17 containing 709 bp downstream of <i>vapF</i>                                                                                                                                     | This study       |
| pVirR                                          | pSET152 containing a 1872 bp fragment including the 5' end of <i>orf3</i> and <i>virR</i>                                                                                              | This study       |
| pVirRS                                         | pSET152 containing a 2890 bp fragment including <i>virR</i> and <i>virS</i> .                                                                                                          | This study       |
| pVirS                                          | Derivative of pVirRS incorporating a two nucleotide insertion after position 484 of <i>virR</i>                                                                                        | This study       |
| pVirRSvapA                                     | Derivative of pVirRS carrying a 1268 bp fragment containing <i>vapA</i> downstream of <i>virS</i>                                                                                      | This study       |
| pMV261vapA                                     | Shuttle plasmid pMV261 containing <i>vapA</i> gene under expression of the <i>Mycobacteria</i> spp. <i>hsp60</i> promoter                                                              | (2)              |
| pAI35                                          | pSET152 derivative containing <i>virR</i> and <i>icgA</i>                                                                                                                              | (6)              |

**Table S2. Oligonucleotides used in this study.**

| <b>Name</b>       | <b>Sequence (5' – 3')<sup>a</sup></b>   | <b>Purpose</b>                                              | <b>Reference</b> |
|-------------------|-----------------------------------------|-------------------------------------------------------------|------------------|
| VapA-hsp60-F      | CGCTGGCCACTCTTCACAAGACG                 | Genotyping of <i>R. equi</i> MDM                            | (5)              |
| VapA-hsp60-R      | CTATGGCCACTAGGCGTTGTGCCA                | Genotyping of <i>R. equi</i> MDM                            | (5)              |
| vapC-int-F        | GGGTCGTCCATCCAAATC                      | Genotyping of <i>R. equi</i> MDM                            | This study       |
| vapC-int-R        | CATTCCCACCGCCTATAC                      | Genotyping of <i>R. equi</i> MDM                            | This study       |
| VapD1             | ATATAT <u>TCTAGA</u> ATGGGTCGGAAGGTAAAC | Genotyping of <i>R. equi</i> MDM                            | (4)              |
| VapD1c            | ATATAT <u>GTTAAC</u> ACTTGTTCCTCACGCAGC | Genotyping of <i>R. equi</i> MDM                            | (4)              |
| VapE1             | ATATAT <u>TCTAGAG</u> TCGCGCTTGAAGTGCGG | Genotyping of <i>R. equi</i> MDM                            | (4)              |
| VapE1c            | ATATAT <u>GTTAAC</u> CAGCTATCGCCAGGCG   | Genotyping of <i>R. equi</i> MDM                            | (4)              |
| VapF1             | ATATAT <u>TCTAGACT</u> GACGATAGCTGGGCCT | Genotyping of <i>R. equi</i> MDM                            | (4)              |
| VapF1c            | ATATAT <u>GTTAAC</u> CAATCATTGCGCTAACAC | Genotyping of <i>R. equi</i> MDM                            | (4)              |
| vapG-int-F        | CCGCCAGAATCACCAGTAAAC                   | Genotyping of <i>R. equi</i> MDM                            | (5)              |
| vapG-int-R        | GCGAACGCGGAAACTTCAATG                   | Genotyping of <i>R. equi</i> MDM                            | (5)              |
| vapI-int-F        | GCCAGTGCGCAAGAAATG                      | Genotyping of <i>R. equi</i> MDM                            | This study       |
| vapI-int-R        | CCGTGTACCGATACTGATTCC                   | Genotyping of <i>R. equi</i> MDM                            | This study       |
| ORF6F-RTPCR       | AGCTGTGCCTGCAACATTCG                    | Genotyping of <i>R. equi</i> MDM                            | (5)              |
| ORF6R-RTPCR       | CTACGCTACATCGCCTATCC                    | Genotyping of <i>R. equi</i> MDM                            | (5)              |
| vapI-upstream-F   | AATT <u>CGGCCG</u> TAATGCGACCGTTCTTG    | Plasmid construction                                        | This study       |
| vapI-upstream-R   | AATT <u>GGATCCT</u> GCAGTCAGCGCGATTG    | Plasmid construction                                        | This study       |
| vapF-downstream-F | AAGT <u>GGATCCT</u> GGCATTCTTGGGAGTG    | Plasmid construction                                        | This study       |
| vapF-downstream-R | AAGT <u>GAAITCC</u> GCGTTGCATCAGGTGG    | Plasmid construction                                        | This study       |
| 004F              | CGGACGAGTTCGACTGGTAT                    | Genotyping of <i>R. equi</i> 103S <sup>P-</sup> /pVirRSvapA | (7)              |
| 004F              | CAAAGACGATTTGGGGTACG                    | Genotyping of <i>R. equi</i> 103S <sup>P-</sup> /pVirRSvapA | (7)              |
| 005F              | CTCTTCCTGATCGGAGTTGC                    | Genotyping of <i>R. equi</i> 103S <sup>P-</sup> /pVirRSvapA | (7)              |
| 005R              | GAGTCGCAGACGAGGTAAGC                    | Genotyping of <i>R. equi</i> 103S <sup>P-</sup> /pVirRSvapA | (7)              |
| 008F              | GAACAACTGGGAATGGTGGT                    | Genotyping of <i>R. equi</i> 103S <sup>P-</sup> /pVirRSvapA | (7)              |

|                    |                                      |                                                                |            |
|--------------------|--------------------------------------|----------------------------------------------------------------|------------|
| 008R               | GTTCCGCCGTTTCTAGACGAA                | Genotyping of <i>R. equi</i> 103S <sup>P-</sup>                | (7)        |
| VapA_182F          | AATGCGACCGTTCTTGATTC                 | /pVirRSvapA<br>Genotyping of <i>R. equi</i> 103S <sup>P-</sup> | (8)        |
| VapA_182R          | TCTCCGTGAACGTCGTA                    | /pVirRSvapA<br>Genotyping of <i>R. equi</i> 103S <sup>P-</sup> | (8)        |
| Orf8 InterSeq_918F | AATGCGGCCGCTGAGTTCAGCGACAGG<br>AGTG  | Plasmid<br>construction                                        | This study |
| Orf8 InterSeq_918R | GCCGACATGTGCAGGTCCGGAATACAT<br>GA    | Plasmid<br>construction                                        | This study |
| vapA_PciI F        | GCAACATGTAGACCAACATCGTTCGCG          | Plasmid<br>construction                                        | This study |
| vapA_PciI R        | GATCACATGTCTAGGCGTTGTGCCAGC<br>TAC   | Plasmid<br>construction                                        | This study |
| PAI38d12_2890 F    | GTCTGATCACCTCAAGGGCGTCGACCA<br>AG    | Plasmid<br>construction                                        | This study |
| PAI4_1872R         | TGCGACATGTAGTGTTCGACGCTAGGA<br>GGG   | Plasmid<br>construction                                        | This study |
| 4aa8_9468F         | CACCCCTTAGCGGGGCGTGCAAGACTA<br>TCCGG | Plasmid<br>construction                                        | This study |
| 4aa8_9468R         | CCGGATAGTCTTGCACGCCCGCTAAG<br>GGGTG  | Plasmid<br>construction                                        | This study |
| rpoA_201F          | TCGACGTGGAGACCAAGAAC                 | qPCR/microarray<br>validation                                  | This study |
| rpoA_201R          | TGTAGGAACGAACCGTCAGG                 | qPCR/microarray<br>validation                                  | This study |
| GyrCOOH1           | GTCGAGCAGGGTCACGTGTA                 | qPCR/microarray<br>validation                                  | (7)        |
| GyrCOOH25'         | AGCTCCTTTGCGTTCATCT                  | qPCR/microarray<br>validation                                  | (7)        |
| REQ140_191F        | GGTCACCATCCTCAAGTCGT                 | qPCR/microarray<br>validation                                  | This study |
| REQ140_191R        | GCGTCGACCACAGGATCT                   | qPCR/microarray<br>validation                                  | This study |
| REQ4990_186F       | GACTCGACGTCCTGGTCAAC                 | qPCR/microarray<br>validation                                  | This study |
| REQ4990_186R       | CGGACGTGGAGCTGAAGT                   | qPCR/microarray<br>validation                                  | This study |
| REQ7620_191F       | CCCCTGAACTACCAGGTCAA                 | qPCR/microarray<br>validation                                  | This study |
| REQ7620_191R       | ATCGCTTCGATGGTGATCC                  | qPCR/microarray<br>validation                                  | This study |
| REQ14460_198F      | CAACCTCTTCCTGGACATGG                 | qPCR/microarray<br>validation                                  | This study |
| REQ14460_198R      | TCGATGTCACACAGGACCAC                 | qPCR/microarray<br>validation                                  | This study |
| REQ15980_171F      | AGGTGATCTCCCAGCTGATG                 | qPCR/microarray<br>validation                                  | This study |
| REQ15980_171R      | AGATGTTGCCGATGTGTTTG                 | qPCR/microarray<br>validation                                  | This study |
| REQ31040_150F      | TCGAAAGTCTCAACGACGTG                 | qPCR/microarray<br>validation                                  | This study |
| REQ31040_150R      | ACACGTTTCCGTGAGAGAGC                 | qPCR/microarray<br>validation                                  | This study |

|               |                       |                            |            |
|---------------|-----------------------|----------------------------|------------|
| REQ33310_154F | TCAAGCGTGACGTCCACTAC  | qPCR/microarray validation | This study |
| REQ33310_154R | TTGATCGCGTTGTTTCAGGTA | qPCR/microarray validation | This study |
| REQ37050_195F | AAGATGGTGGGCCAGAAGTT  | qPCR/microarray validation | This study |
| REQ37050_195R | GTTGAACGCGTACTTGAGCA  | qPCR/microarray validation | This study |
| REQ41960_158F | CTGTACATGGGGCAGATCG   | qPCR/microarray validation | This study |
| REQ41960_158R | GAGTGGTCCTCGATGGTGTC  | qPCR/microarray validation | This study |
| 20280_168F    | GGCTCTCGTACAAGGAGTGG  | qPCR/microarray validation | This study |
| 20280_168R    | TCAGCAGAGCTGCAGGAAC   | qPCR/microarray validation | This study |
| 42130_185F    | ACCCGCAGTACCTCGTGAT   | qPCR/microarray validation | This study |
| 42130_185R    | GGTGAGTTCGACGACCAGTT  | qPCR/microarray validation | This study |
| 2910_204F     | GGAGATCAAACGCATGTGG   | qPCR/microarray validation | This study |
| 2910_204R     | GCGTAGGCATTGTCGTTGTA  | qPCR/microarray validation | This study |
| 41890_160F    | CGCTGTTTCGAGGTGAAGAAC | qPCR/microarray validation | This study |
| 41890_160R    | TAGTGCACGAGAACGGAGTG  | qPCR/microarray validation | This study |
| 19090_170F    | GATCCCGAGAACGAGGAACT  | qPCR/microarray validation | This study |
| 19090_170R    | GTGCGGATCTGGGTGTAGAT  | qPCR/microarray validation | This study |
| 22420_158F    | AGGTCAGCGAAGACCATCTC  | qPCR/microarray validation | This study |
| 22420_158R    | CTTGTCCTTGAAATGGTGGAA | qPCR/microarray validation | This study |
| 37390_201F    | GAACCTTGGAGGATCGATGA  | qPCR/microarray validation | This study |
| 37390_201R    | GACGAGAGGAGTGCCATCAC  | qPCR/microarray validation | This study |
| 24440_178F    | GTCAGCGGCTGTACTCCTTC  | qPCR/microarray validation | This study |
| 24440_178R    | GTGCACTCGTAGACGGTGGT  | qPCR/microarray validation | This study |
| 23320_155F    | ACCAAAGTCGAACGGTTGAT  | qPCR/microarray validation | This study |
| 23320_155R    | AGTTCGCTCTTGTCCCGTTC  | qPCR/microarray validation | This study |

<sup>a</sup> Nucleotides underlined and italicized indicated restriction enzyme sites used for sub-cloning.



Figure S1.

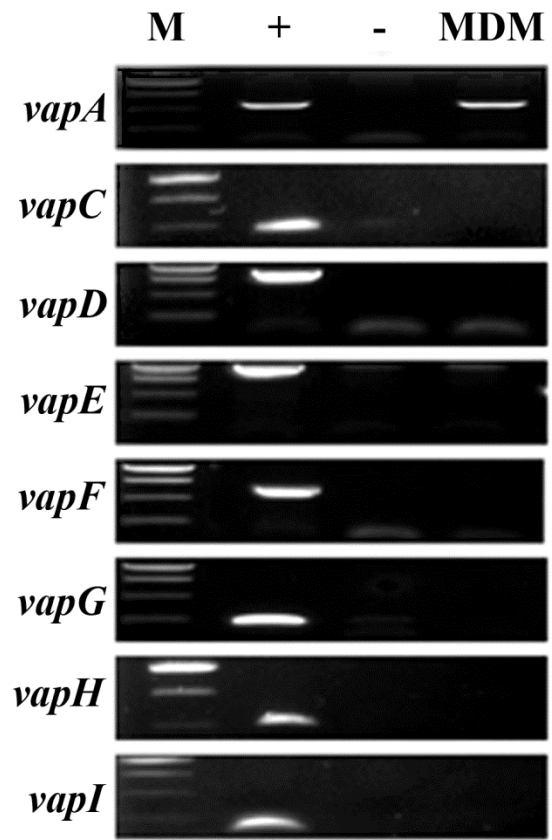

**Figure S2.**

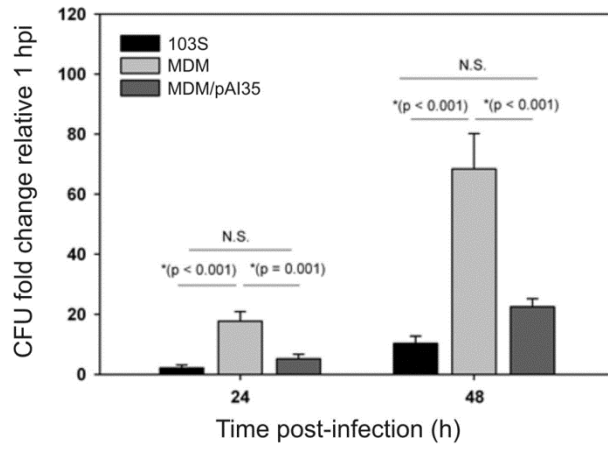

**Figure S3.**

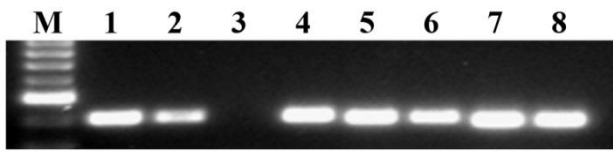

**Figure S4.**

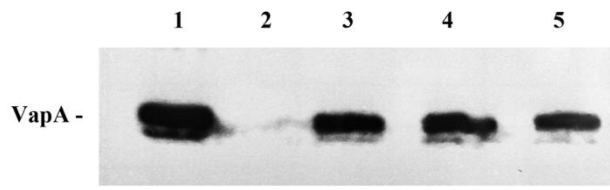

**Figure S5.**

**A**

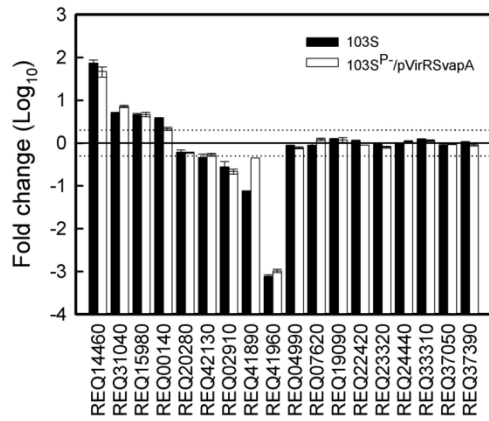

**B**

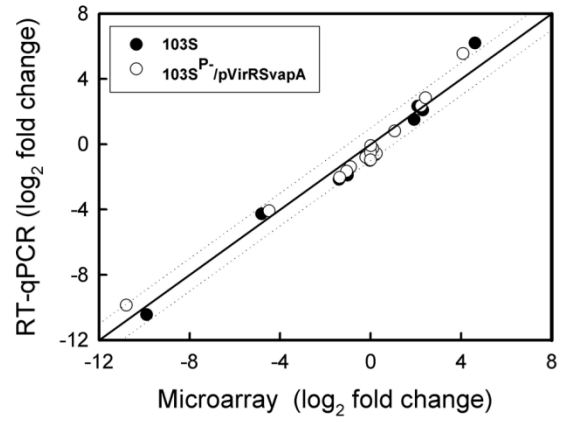

**C**

| Gene     | Description                             | Change in transcript level |
|----------|-----------------------------------------|----------------------------|
| REQ14460 | Sigma-70 factor                         | Upregulated                |
| REQ31040 | Two component system sensor kinase KpdD | Upregulated                |
| REQ15980 | LuxR family transcriptional regulator   | Upregulated                |
| REQ00140 | TetR family transcriptional regulator   | Upregulated                |
| REQ20280 | Rok family transcriptional regulator    | Downregulated              |
| REQ42130 | MarR family transcriptional regulator   | Downregulated              |
| REQ02910 | MarR family transcriptional regulator   | Downregulated              |
| REQ41890 | GntR family transcriptional regulator   | Downregulated              |
| REQ41960 | IcIR family transcriptional regulator   | Downregulated              |
| REQ04990 | Short chain dehydrogenase               | Unchanged                  |
| REQ07620 | alpha/beta hydrolase                    | Unchanged                  |
| REQ19090 | TetR family transcriptional regulator   | Unchanged                  |
| REQ22420 | TetR family transcriptional regulator   | Unchanged                  |
| REQ23320 | Transcriptional regulator               | Unchanged                  |
| REQ24440 | MerR family transcriptional regulator   | Unchanged                  |
| REQ33310 | Preprotein translocase SecA             | Unchanged                  |
| REQ37050 | Naphthoate synthase                     | Unchanged                  |
| REQ37390 | MerR family transcriptional regulator   | Unchanged                  |

88 **SUPPLEMENTARY REFERENCES**

89

90 1. **van der Geize, R., de Jong W., G. I. Hessels, A. W. Grommen, A. A. Jacobs, and L.**  
91 **Dijkhuizen.** 2008. A novel method to generate unmarked gene deletions in the  
92 intracellular pathogen *Rhodococcus equi* using 5-fluorocytosine conditional lethality.  
93 *Nucleic Acids Res.* **36**:e151.

94 2. **Hong, Y. and M. K. Hondalus.** 2008. Site-specific integration of *Streptomyces*  $\Phi$ C31  
95 integrase-based vectors in the chromosome of *Rhodococcus equi*. *FEMS*  
96 *Microbiol.Lett.* **287**:63-68.

97 3. **Giguère, S., M. K. Hondalus, J. A. Yager, P. Darrah, D. M. Mosser, and J. F.**  
98 **Prescott.** 1999. Role of the 85-kilobase plasmid and plasmid-encoded virulence-  
99 associated protein A in intracellular survival and virulence of *Rhodococcus equi*.  
100 *Infect.Immun.* **67**:3548-3557.

101 4. **Jain, S., B. R. Bloom, and M. K. Hondalus.** 2003. Deletion of *vapA* encoding  
102 Virulence Associated Protein A attenuates the intracellular actinomycete *Rhodococcus*  
103 *equi*. *Mol.Microbiol* **50**:115-128.

104 5. **Coulson, G. B., S. Agarwal, and M. K. Hondalus.** 2010. Characterization of the role  
105 of the pathogenicity island and *vapG* in the virulence of the intracellular actinomycete  
106 pathogen *Rhodococcus equi*. *Infect.Immun.* **78**:3323-3334.

107 6. **Wang, X., G. B. Coulson, A. A. Miranda-Casoluengo, R. Miranda-Casoluengo, M.**  
108 **K. Hondalus, and W. G. Meijer.** 2014. IcgA is a virulence factor of *Rhodococcus equi*  
109 that modulates intracellular growth. *Infect.Immun.* **82**:1793-1800.

110 7. **Byrne, G. A., D. A. Russell, X. Chen, and W. G. Meijer.** 2007. Transcriptional  
111 regulation of the *virR* operon of the intracellular pathogen *Rhodococcus equi*.  
112 *J.Bacteriol* **189**:5082-5089.

113 8. **Miranda-Casoluengo, R., G. B. Coulson, A. Miranda-Casoluengo, J. A. Vazquez-**  
114 **Boland, M. K. Hondalus, and W. G. Meijer.** 2012. The hydroxamate siderophore

115 rhequichelin is required for virulence of the pathogenic actinomycete *Rhodococcus*  
116 *equi*. Infect.Immun. **80**:4106-4114.

117
